# Supplementary material for: Activation of Store-Operated Calcium Entry in Airway Smooth Muscle Cells: Insight from a Mathematical Model
Source: PubMed Central journal article supplement (PMC3723852; doi:10.1371/journal.pone.0069598), 2013-07-25
Supplement: pone.0069598.s001.pdf [file pone.0069598.s001.pdf]

## Supporting Information S1 to:

### “Activation of store-operated calcium entry in airway smooth muscle cells: insight from a mathematical model”

Huguette Croisier<sup>1,\*</sup>, Xiahui Tan<sup>2</sup>, Jose F. Perez-Zoghbi<sup>3</sup>, Michael J. Sanderson<sup>2</sup>, James Sneyd<sup>4</sup>, Bindi S. Brook<sup>1</sup>

**1** School of Mathematical Sciences, University of Nottingham, Nottingham, UK.

**2** Department of Microbiology and Physiological Systems, University of Massachusetts Medical School, Worcester, MA, USA.

**3** Department of Cell Physiology and Molecular Biophysics, Texas Tech University Health Sciences Center, Lubbock, TX, USA.

**4** Department of Mathematics, University of Auckland, Auckland, New Zealand.

\* E-mail: Huguette.Croisier@nottingham.ac.uk

## Parameter estimation procedure

In this section, we give more detail about the rationale which has guided our parameter estimation. From Eq. (13b), in the absence of agonist, the equilibrium  $\text{Ca}^{2+}$  concentrations obey:

$$c_s^* = c^* + \frac{V_e}{J_{SR}} \frac{c^{*2}}{K_e^2 + c^{*2}}.$$

Assuming  $c^* \sim K_e$  (that is, assuming  $K_e \sim 0.1\mu\text{M}$ ), to satisfy the experimental constraint  $c_s^*/c^* \gg 1$ , we must have  $\frac{J_{SR}}{V_e/K_e} \ll 1$ . Also, as  $J_{leakSR}$  represents a small  $\text{Ca}^{2+}$  leak through the SR membrane, it must be that  $\frac{J_{SR}}{k_{IPR}} \ll 1$ . These are our first two constraints on parameter values.

We must also have  $\frac{k_{RyR}}{J_{SR}} \gg 1$  for the SR to be largely depleted by the Rya-Caf treatment, so that (i) SOCE is activated ( $c_s \lesssim K_s$ ) and (ii) agonist stimulation is no longer able to trigger substantial  $\text{Ca}^{2+}$  release from the SR after the treatment.

The IPR rate  $k_{IPR}$  must also be large enough so that for  $p/K_1 \gg 1$  (for which  $P_{IPR}$  is saturated as a function of  $p$ , cf. Eq. (7)),  $\text{Ca}^{2+}$  oscillations cease to exist. Otherwise, stable  $\text{Ca}^{2+}$  oscillations persist in an unphysiologically large, and possibly semi-infinite, range of agonist concentrations (this can happen if the ROCE rate is zero, because then, for  $p/K_3 \gg 1$ , increasing  $p$  no longer influences  $\text{Ca}^{2+}$  dynamics, as  $\Phi_1$  and  $\Phi_2$  are saturated (Eq. (9)).

Moreover, in order to have  $c_s^* > 100\mu\text{M}$  (to match the experimental estimation  $c_s^* \sim 500\mu\text{M}$  [1]), which is equivalent to  $c_s^* > 1000c^*$ , the quantity  $\frac{V_e/K_e}{J_{SR}}$  must be so large that to keep the  $[\text{Ca}^{2+}]_i$  oscillation amplitude reasonable, we have to set simultaneously the maximum PMCA rate  $V_p$  to  $V_p \sim V_e$  and the PMCA affinity to  $K_p \sim 1\mu\text{M}$ . Increasing only  $V_p$  kills the oscillations, and changing  $k_{IPR}$  has little effect on the oscillation amplitude. At the same time, SOCE must be large enough compared with the PMCA  $\text{Ca}^{2+}$  flux to maintain an elevated  $[\text{Ca}^{2+}]_i$  after the Rya-Caf treatment. As a consequence, the  $\text{Ca}^{2+}$  fluxes through the PM are not negligible in our model, and the total  $\text{Ca}^{2+}$  concentration  $c_t = c + c_s/\gamma$  cannot be considered as a slow variable for model reduction purpose, as it is in several models of  $\text{Ca}^{2+}$  dynamics (e.g., [2–4]). In order to make that approximation, we would need  $c_s \lesssim 100c$ , but this would disagree with the current experimental estimations.

Finally, it is instructive to consider non-dimensional estimates of the relative magnitudes of the different  $\text{Ca}^{2+}$  fluxes in the model, since these ratios control the qualitative dynamics of  $\text{Ca}^{2+}$ . This is done in Table S1, together with a comparison with the same quantities in the Wang *et al.* model [4]. We note, in particular, that the ratio between the PMCA and SERCA rates is much smaller in the Wang

*et al.* model than in our model, while it is the contrary for the ratio between the IPR and SERCA rates. The equilibrium  $\text{Ca}^{2+}$  concentrations of the two models are also compared in Table S1.

| quantity                                      | expression                 | this work | Wang <i>et al.</i> [4] | ratio |
|-----------------------------------------------|----------------------------|-----------|------------------------|-------|
| $J_{SOCC}/J_{PMCA}$                           | $\frac{V_s K_p}{K_s V_p}$  | 0.00628   | 0                      | 0     |
| $J_{leakin}/J_{PMCA}$                         | $\frac{\alpha_0}{V_p}$     | 0         | 0.0111                 | /     |
| $J_{ROCC}/J_{PMCA}$                           | $\alpha_1 \frac{K_p}{V_p}$ | 0.000209  | 0.0889                 | 424   |
| $J_{VOCC}/J_{PMCA}$                           | $\frac{V_s K_p}{K_s V_p}$  | 0         | 0.2                    | /     |
| $J_{PMCA}/J_{SERCA}$                          | $\frac{V_p K_e}{K_p V_e}$  | 0.1       | 0.0125                 | 0.125 |
| $J_{IPR}/J_{SERCA}$                           | $k_{IPR} \frac{K_e}{V_e}$  | 0.0133    | 0.123                  | 9.25  |
| $J_{RyR}/J_{SERCA}$                           | $k_{RyR} \frac{K_e}{V_e}$  | 0         | 0.0371                 | /     |
| $J_{leakSR}/J_{SERCA}$                        | $J_{SR} \frac{K_e}{V_e}$   | 0.0002    | 0.00222                | 11.1  |
| $J_{leakSR}/J_{IPR}$                          | $\frac{J_{SR}}{k_{IPR}}$   | 0.015     | 0.018                  | 1.2   |
| resting $[\text{Ca}^{2+}]_i (\mu\text{M})$    | $c^*$                      | 0.0681    | 0.161                  | N.A.  |
| resting $[\text{Ca}^{2+}]_{SR} (\mu\text{M})$ | $c_s^*$                    | 158       | 27.4                   | N.A.  |

**Table S1. Relative magnitudes of the different  $\text{Ca}^{2+}$  fluxes in our model and in the Wang *et al.* model [4].** The last column gives the ratio of the previous two. The equilibrium  $\text{Ca}^{2+}$  concentrations are also given.

## References

1. Demaurex N, Frieden M (2003) Measurements of the free luminal ER  $\text{Ca}^{2+}$  concentration with targeted cameleon fluorescent proteins. *Cell Calcium* 34: 109–119.
2. Tang Y, Stephenson JL, Othmer HG (1996) Simplification and analysis of models of calcium dynamics based on IP3-sensitive calcium channel kinetics. *Biophys J* 70: 246–63.
3. Sneyd J, Tsaneva-Atanasova K, Yule DI, Thompson JL, Shuttleworth TJ (2004) Control of calcium oscillations by membrane fluxes. *PNAS* 101: 1392–6.
4. Wang IY, Bai Y, Sanderson MJ, Sneyd J (2010) A mathematical analysis of agonist- and KCl-induced  $\text{Ca}^{2+}$  oscillations in mouse airway smooth muscle cells. *Biophys J* 98: 1170–81.
